# Supplementary material for: Diazoxide for Neonatal Hyperinsulinemic Hypoglycemia and Pulmonary Hypertension
Source: MDPI journal article supplement (doi:10.3390/children10010005), 2022-12-21
Supplement: s1 [file s1]

Table S1: Clinical and echocardiographic characteristics of neonates who developed pulmonary hypertension following diazoxide therapy.

| ID Code | Sex | Gestational Age at Birth (weeks) | Birth Weight | IUGR           | Age at diazoxide initiation | Starting dose (mg/kg /d) | Max dose (mg/kg /d) | Prior history of pulmonary hypertension | Respiratory Support prior to diazoxide therapy | Echocardiogram prior to diazoxide therapy.                                           | Echocardiogram on diazoxide (+days on diazoxide)                                                                                                                                                                                                                                                                                                    | Respiratory support on diazoxide therapy                                             | Other complications.                              | Outcome                                                                                                                     |
|---------|-----|----------------------------------|--------------|----------------|-----------------------------|--------------------------|---------------------|-----------------------------------------|------------------------------------------------|--------------------------------------------------------------------------------------|-----------------------------------------------------------------------------------------------------------------------------------------------------------------------------------------------------------------------------------------------------------------------------------------------------------------------------------------------------|--------------------------------------------------------------------------------------|---------------------------------------------------|-----------------------------------------------------------------------------------------------------------------------------|
| G       | M   | 27 0/7                           | 475g         | Yes, with AEDF | 11 weeks                    | 10                       | 10                  | Yes                                     | CPAP 7 cm H <sub>2</sub> O, 27% Oxygen         | PDA s/p transcatheter closure, IV* septum mildly flattened throughout cardiac cycle. | (+7 days) IV septum moderately flattened throughout cardiac cycle. (+14 days) RV systolic pressure at least 90mmHg (while patient agitated) and 78mmHg (calm) plus RA** pressure. IV septum moderately flattened throughout cardiac cycle.                                                                                                          | Conventional ventilator with inhaled nitric oxide                                    | Dubin-Johnson syndrome                            | Recovered after 4 weeks on ventilator and 7 weeks on inhaled nitric oxide, discharged at 52 weeks corrected gestational age |
| H       | F   | 29 3/7                           | 900g         | Yes, with AEDF | 6 weeks                     | 5                        | 6.5                 | No                                      | Room Air                                       | IV septum mildly flattened throughout cardiac cycle                                  | (+13 days) RV systolic pressure at least 62.4mmHg plus RA pressure, IV septum moderately flattened throughout cardiac cycle. Moderate dilation and mild hypertrophy of RV. (+27 days) RV systolic pressure at least 77.8mmHg plus RA pressure. IV septum severely flattened throughout cardiac cycle. Moderate dilation and mild hypertrophy of RV. | High Flow Nasal Cannula, inhaled nitric oxide                                        | Twin, Laryngomalacia requiring supraglottoplasty. | Recovered and returned to room air 10 weeks after diazoxide. Discharged at 48 weeks corrected gestational age.              |
| I       | M   | 34 2/7                           | 1320g        | Yes            | 12 days                     | 10                       | 10                  | No                                      | CPAP 5 cm H <sub>2</sub> O, 21% Oxygen         | IV septum mildly flattened throughout cardiac cycle, no evidence of PDA              | (+7 days) Moderate PDA with bidirectional shunt. IV septum moderately flattened throughout cardiac cycle. (+20 days) Moderate PDA predominantly right to left shunt. IV septum moderately                                                                                                                                                           | Intubation and high frequency oscillatory ventilation, inhaled nitric oxide. Hypoxic | Ambiguous genitalia with XY karyotype             | Demise during ECLS, related to pulmonary hypertensive crisis.                                                               |

|   |   |        |       |     |        |    |    |     |                                   |                                                       |                                                                   |                                      |                                              |                                       |
|---|---|--------|-------|-----|--------|----|----|-----|-----------------------------------|-------------------------------------------------------|-------------------------------------------------------------------|--------------------------------------|----------------------------------------------|---------------------------------------|
|   |   |        |       |     |        |    |    |     |                                   |                                                       | flattened throughout cardiac cycle.                               | respiratory failure leading to ECMO. |                                              |                                       |
| R | M | 35 0/7 | 2585g | Yes | 2 days | 10 | 10 | Yes | Nasal Cannula, 2L/min, 21% Oxygen | RV systolic pressure at least 44mmHg plus RA pressure | (+ 4 days) RV systolic pressure at least 74mmHg plus RA pressure. | CPAP 6, 28%                          | Deletion of Recurrent Proximal 1q21.1 Region | Recovered and discharged on room air. |

IV, Intraventricular  
CPAP, continuous positive airway pressure  
PDA, patent ductus arteriosus  
RA, Right atrium  
RV, Right ventricle  
AEDF, absent end-diastolic flow  
ECMO, extracorporeal membrane oxygenation.
